# Supplementary figures and images for: Pentraxin 3 Inhibits the Angiogenic Potential of Multiple Myeloma Cells
Source: MDPI journal article supplement (doi:10.3390/cancers13092255), 2021-05-08

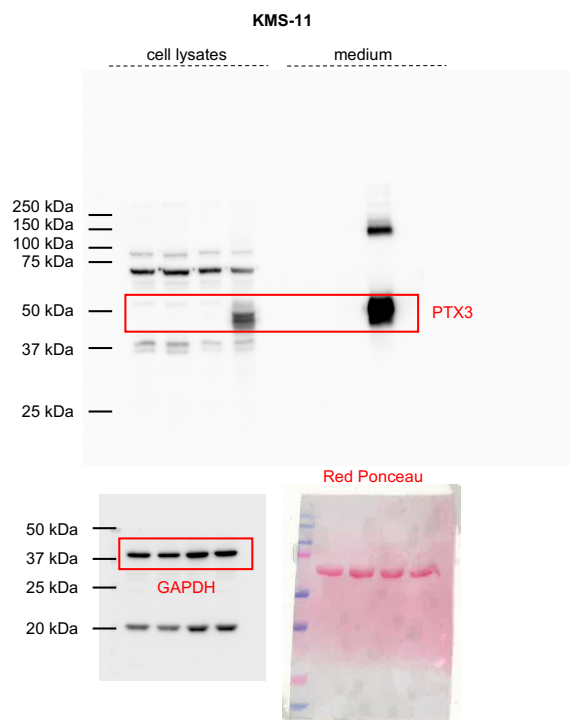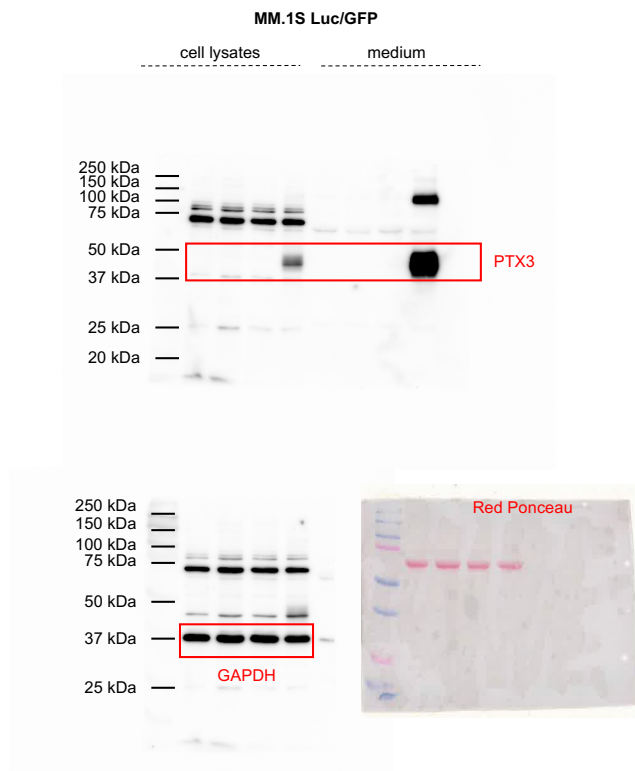

Supplement: s1 [file s1]
